# Supplementary material
Source: publisher figshare collection journal article supplement (https://frontiersin.figshare.com/ndownloader/files/34809133)

a

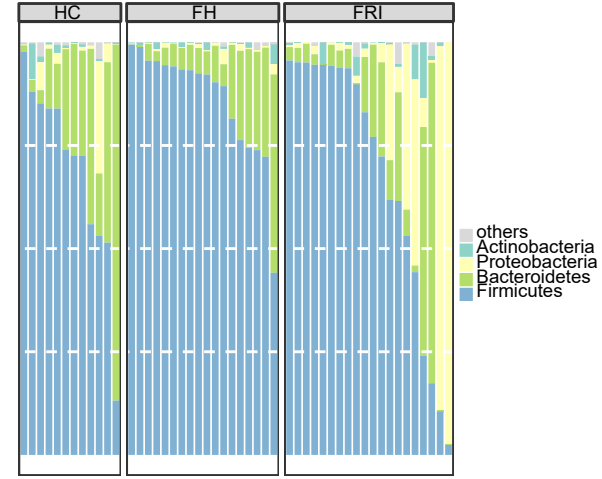

b

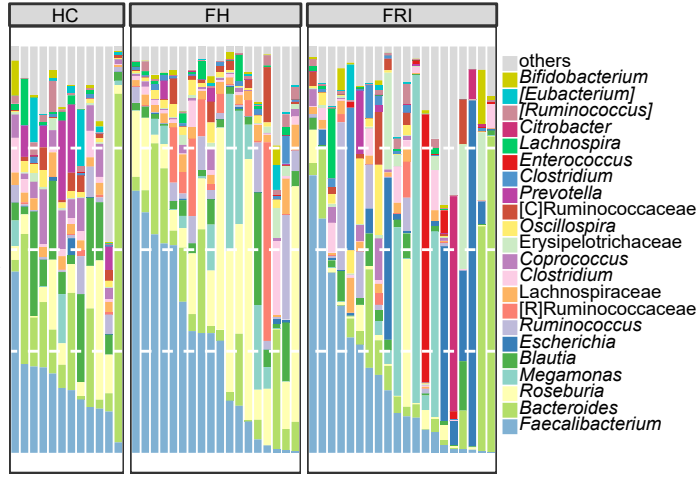

c

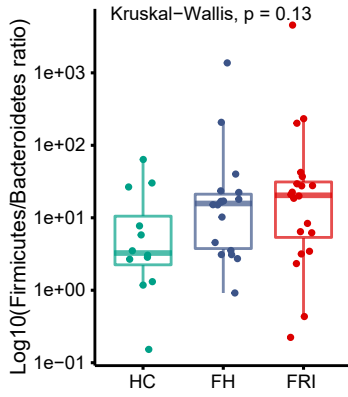

Supplement: Supplementary file [file 34809133]
